# Supplementary material for: Theaflavin 3′-gallate activates G protein-coupled receptor 55 (GPR55) and enhances GLP-1 secretion via Ca2+/CaMKII/ERK signaling in enteroendocrine STC-1 cells, mitigating postprandial hyperglycemia in mice
Source: Royal Society of Chemistry journal article supplement (doi:10.1039/d4fo06162d), 2025-01-01
Supplement: d4fo06162d1.pdf [file d4fo06162d1.pdf]

Supplementary data

1  
2  
3  
4  
5  
6  
7  
8  
9  
10  
11  
12  
13  
14  
15  
16  
17  
18  
19  
20

**Theaflavin 3'-gallate activates G protein-coupled receptor (GPR55) and enhances GLP-1 secretion via Ca<sup>2+</sup>/CaMKII/ERK signaling in enteroendocrine STC-1 cells, mitigating postprandial hyperglycemia in mice**

Kevin Odongo<sup>1\*</sup>, Naoki Harada<sup>2</sup>, Ryoichi Yamaji<sup>2</sup>, Yoko Yamashita<sup>1</sup>, Hitoshi Ashida<sup>1, 3\*</sup>

<sup>1</sup>*Department of Agrobioscience, Graduate School of Agricultural Science, Kobe University, Kobe, Hyogo, 657-8501, Japan.*

<sup>2</sup>*Division of Applied Life Sciences, Graduate School of Life and Environmental Sciences, Osaka Metropolitan University, Sakai, Osaka, 599-8531, Japan.*

<sup>3</sup>*Faculty of Food Science and Nutrition, Mukogawa Women's University, Nishinomiya, Hyogo, 663-8558, Japan.*

21 **Figure legends**

22 Figure S1. This supplementary figure is related to Figure 2 in the manuscript.

23 Figure S2. This supplementary figure is related to Figure 4D in the manuscript.

24 Figure S3. This supplementary figure is related to Figure 6A in the manuscript.

25 Figure S4. This supplementary figure is related to Figure 6B in the manuscript.
